# Supplementary material for: Aberrant HDAC3 expression correlates with brain metastasis in breast cancer patients
Source: PubMed Central journal article supplement (PMC7471029; doi:10.1111/1759-7714.13561), 2020-07-20
Supplement: TCA-11-2493-s002.pdf [file TCA-11-2493-s002.pdf]

**Table S1. The clinicopathological characteristics of 161 IDC patients.**

| <b>Variables</b>                                     | <b>Patients without BM, n (%)</b> | <b>Patients with BM, n (%)</b> |
|------------------------------------------------------|-----------------------------------|--------------------------------|
| <b>Age, y</b>                                        |                                   |                                |
| <48                                                  | 40(40.8)                          | 35(55.6)                       |
| ≥48                                                  | 58(59.2)                          | 28(44.4)                       |
| <b>Tumor size, cm<sup>†</sup></b>                    |                                   |                                |
| ≤2                                                   | 19(19.4)                          | 8(13.8)                        |
| 2-5                                                  | 67(68.4)                          | 31(53.4)                       |
| >5                                                   | 12(12.2)                          | 19(32.8)                       |
| <b>Lymph node status<sup>†</sup></b>                 |                                   |                                |
| Negative                                             | 38(38.8)                          | 20(32.8)                       |
| Positive                                             | 60(61.2)                          | 41(67.2)                       |
| <b>Histological grade<sup>†</sup></b>                |                                   |                                |
| I                                                    | 13(13.3)                          | 0(0)                           |
| II                                                   | 78(79.6)                          | 33(55.0)                       |
| III                                                  | 7(7.1)                            | 27(45.0)                       |
| <b>Molecular subtypes<sup>†</sup></b>                |                                   |                                |
| Luminal                                              | 80(81.6)                          | 30(51.7)                       |
| HER2 overexpression                                  | 7(7.1)                            | 11(19.0)                       |
| Triple negative                                      | 11(11.2)                          | 17(29.3)                       |
| <b>Number of brain metastases<sup>†</sup></b>        |                                   |                                |
| Single                                               | /                                 | 20(36.4)                       |
| Multiple                                             | /                                 | 35(63.6)                       |
| <b>Meningeal metastasis complication<sup>†</sup></b> |                                   |                                |
| No                                                   | /                                 | 44(74.6)                       |
| Yes                                                  | /                                 | 15(25.4)                       |
| <b>CNS surgery</b>                                   |                                   |                                |
| No                                                   | /                                 | 14(22.2)                       |
| Yes                                                  | /                                 | 49(77.8)                       |
| <b>CNS radiotherapy<sup>†</sup></b>                  |                                   |                                |
| No                                                   | /                                 | 17(28.8)                       |
| Yes                                                  | /                                 | 42(71.2)                       |

<sup>†</sup>some data were missing.

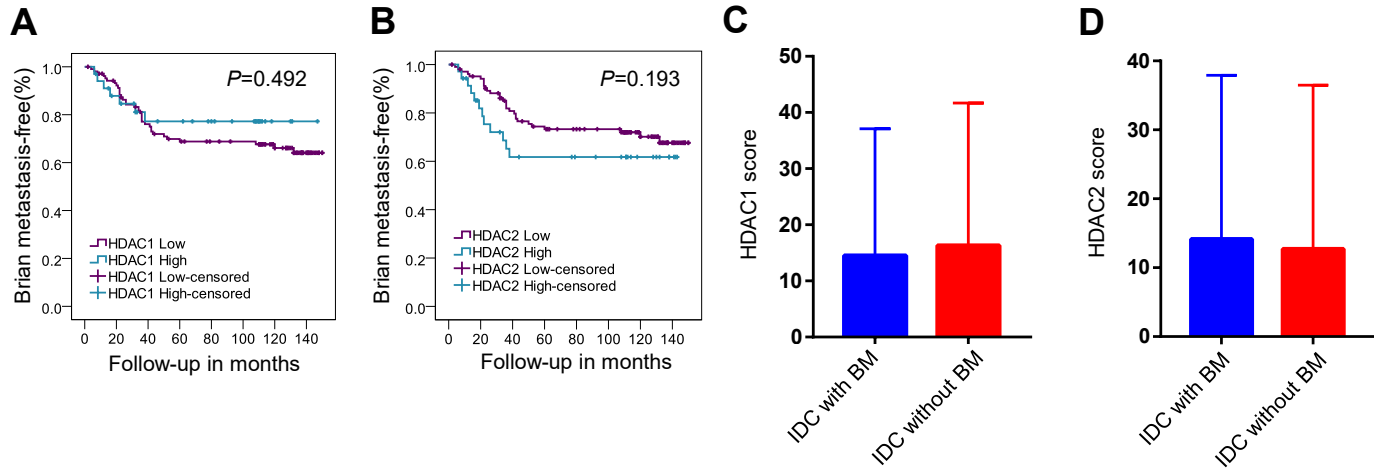

**Figure S1. HDAC1 & HDAC2 exhibited no statistically significant correlation with brain metastasis of IDC patients. (A)-(B):** Brain metastasis-free survival (BMF) curves of 139 IDC patients with different HDAC1(A) and HDAC2(B) levels.  $P$  value of the Kaplan-Meier plots in (A)-(B) were calculated by log-rank test in SPSS. **(C)-(D):** HDAC1 (C) and HDAC2 (D) IHC scores of IDC patients with BM ( $n=41$ ) and without BM( $n=98$ ) were compared quantitatively and shown by mean  $\pm$  SD visually.  $P$  value of (C)-(D) were calculated by unpaired  $t$  test with Welch's correction, both  $P > 0.05$ .

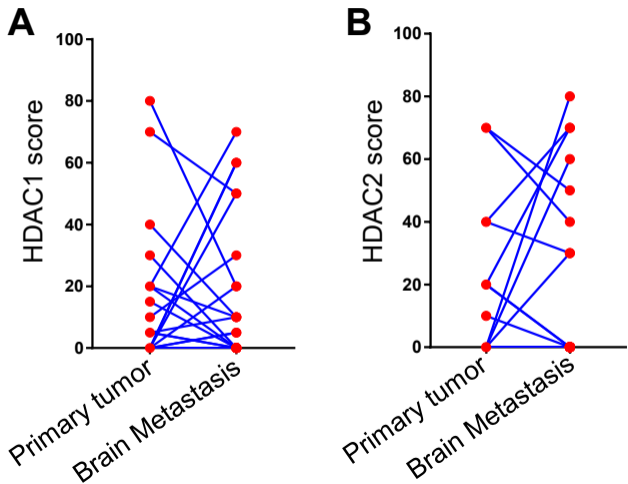

**Figure S2.** There were no significant differences of HDAC1 & HDAC2 expression between primary tumors and brain metastases of IDC patients.

**(A)-(B):** HDAC1(A) and HDAC2(B) IHC scores of 24 primary breast tumors and matched brain metastases were shown by symbols & lines plot, and  $P$  values were calculated by paired t test (scores were overlapped in some cases, both  $P > 0.05$ ).

**A**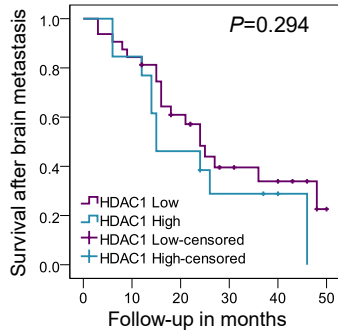**B**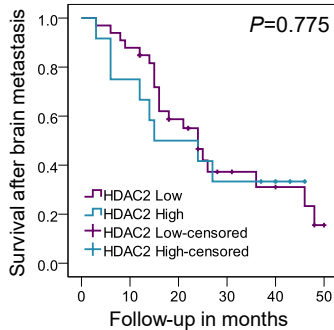

**Figure S3. HDAC1 or HDAC2 expression in brain metastases was not correlated with the survival after brain metastasis of IDC patients. (A)-(B):**The relationship between HDAC1(A, expression of brain metastases, n=45), HDAC2(B, expression of brain metastases, n=45) and survival after brain metastasis of IDC patients were shown in corresponding Kaplan-Meier plots, and  $P$  value were calculated by log-rank test in SPSS.
